# Supplementary material for: The first direct probing of porosity on supported mesoporous silica thin films through hyperpolarised129Xe NMR
Source: Royal Society of Chemistry journal article supplement (doi:10.1039/b207127d), 2002-01-01
Supplement: b207127d.doc [file b207127d.doc]

The first direct probing of porosity on supported mesoporous silica thin films through hyper polarised 129Xe NMR

**Andrei Nossova, Elias Haddada, Flavien Guenneaua, Claude Mignona, Antoine Gédéona***

**David Grossob, Florence Babonneaub, Christian Bonhommeb, Clément Sanchezb*.**

### Electronic Supplementary Information

# Materials

The mesoporous silica thin films were prepared via the sol-gel chemistry process. The sol was prepared via the hydrolysis-condensation of tetraethoxysilane (Si(OCH2CH3)4 or TEOS) in acid/water/ethanol medium and in the presence of cetyltrimethylammonium bromide (C16H33N(CH3)3Br or CTAB) as structuring agent. The typical molar ratios TEOS/CTAB/HCl/H2O/EtOH are 1/0.1/4.10-3/5/20 respectively.

## NMR measurements

The continuous flow system for production of hyperpolarized xenon consists of the optical pumping cell in the fringe field of the spectrometer magnet, circulation pump, oxygen traps for fine purification of the gas mixture, and the vacuum manifold1. The polarization of xenon gas was performed by two 30 W lasers. A flow of 1% Xe-1% N2- 98% He mixture was delivered to the sample at 50-75 cc/min rate. Variable temperature 129Xe NMR spectra were obtained at 83.03 MHz using a Bruker AMS-300 spectrometer. 1024 scans have been acquired with 6.5 s (/2) pulses and 1s interpulse delays, which was found to be sufficient to avoid saturation of the signal at flow rates of the gas mixture used. The chemical shifts were referenced to the signal of xenon gas.

1. K.J. Edder, P.A. Reynolds, J.W. White, D.J. Cookson, *J. Chem. Soc. Faraday Trans*. 1997, **93**, 199.

# Organical modification of silica surface

We are currently performing HP 129Xe NMR experiments on organically modified mesoporous silica films prepared by dipping the surfactant-free films over night in a solution of phenyltrimethoxysilane (C6H5Si(OMe)3)in toluene ( see Figure.) The first results show after modification of the mesoporous surface, a clear down field shift of the resonance peak of about 50 ppm and a significant increase in line width.

**Fig.** HP 129Xe NMR spectra ( recorded at 143 K ): (a) a pure silica film; (b) a functionalised silica film

The large chemical shift value ( 190 ppm) recorded at 143K on the functionalised silica film certainly arises from xenon interaction with the organic phase inside the pores. Indeed, this chemical shift is very close to those reported for Xe adsorbed within organic hydrophobic moieties2. The non-symmetric shape and the broadness of the signal can be due to a distribution of adsorption sites for xenon, which might indicate a non-uniform distribution of the organic phase within the film in agreement with previous work published on mesoporous silica powders.3

1. M. A. Springuel-Huet J.L. Bonardet, J. Fraissard, A. Gédéon, *J. Magn. Reson*. 1999, **138**, 155.
2. M.H. Lim, A. Stein, *Chem. Mater*. 1999, **11**, 3285.
